# Supplementary material
Source: PubMed Central journal article supplement (PMC6953897)
Supplement: mmc1.pdf [file mmc1.pdf]

YMTHE, Volume 28

## **Supplemental Information**

**Ablation of Immunoproteasome  $\beta 5i$  Subunit**

**Suppresses Hypertensive Retinopathy**

**by Blocking ATRAP Degradation in Mice**

**Shuai Wang, Jing Li, Tong Wang, Jie Bai, Yun-Long Zhang, Qiu-Yue Lin, Jing-min Li, Qi Zhao, Shu-Bin Guo, and Hui-Hua Li**

## Supplemental data

### 1. Figures

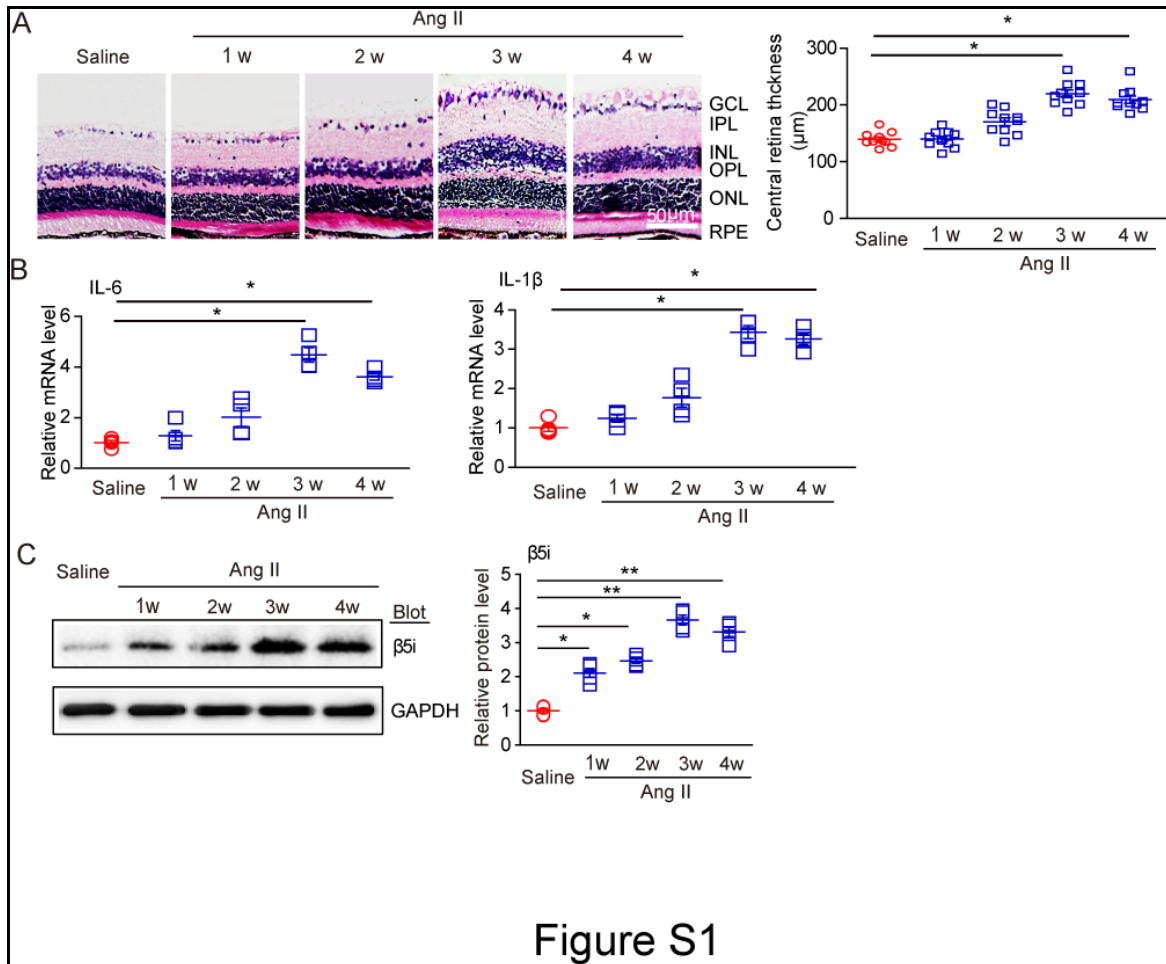

**Figure S1. Ang II induces central retinal thickness and proinflammatory cytokine expression at different time points.** (A) Male WT and  $\beta 5i$  KO mice at 10–12-week-old were infused with saline or Ang II at a dose of 3000 ng/kg/minute using ALZET 1004 micro-osmotic pumps for 1-4 weeks. H&E staining of central retinal sections (left) and quantification of retinal thickness (right;  $n = 5$  per group). Scale bar: 50  $\mu\text{m}$ . (B) PCR analysis of *IL-6* and *IL-1 $\beta$*  messenger ribonucleic acid (mRNA) levels in the retinas ( $n = 4$  per group). (C) Immunoblotting analysis of  $\beta 5i$  protein levels in the retinas ( $n = 4$  per group). Data are presented as mean  $\pm$  SEM. \* $P < 0.05$ , \*\* $P < 0.01$  versus saline control.

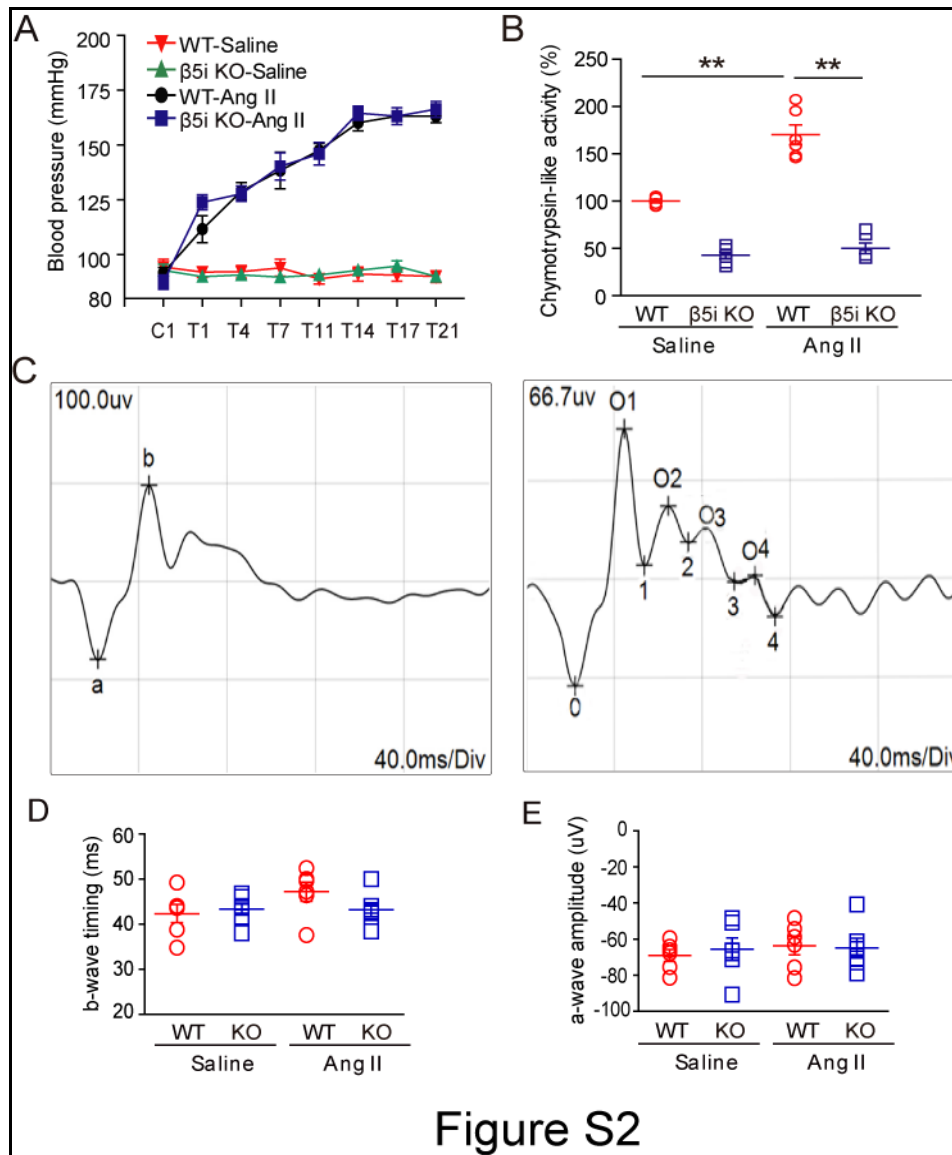

Figure S2

**Figure S2. Effect of  $\beta 5i$  knockout on average blood pressure and chymotrypsin-like activity.** (A) WT and  $\beta 5i$  KO mice were infused with Ang II at a dose of 3000 ng/kg/minute or saline for 3 weeks. Measurement of average systolic blood pressure (SBP) in each group before (C) and after saline or Ang II treatment (T) period. C1: day 1 before saline or Ang II treatment, T1: day 1 after saline or Ang II treatment etc (n=10 per group). (B) The chymotrypsin-like activity of retinas in each group after saline or Ang II treatment (n=6 per group). (C) A representative ERG waveform (left) and OPs (right) wave from original data. (D) Quantification of b-wave timing (n = 6 per group). (E). Quantification of b-wave amplitude (n = 6 per group). Results are the mean  $\pm$  SEM. \*\* $P < 0.01$  versus WT mice with saline or Ang II infusion.

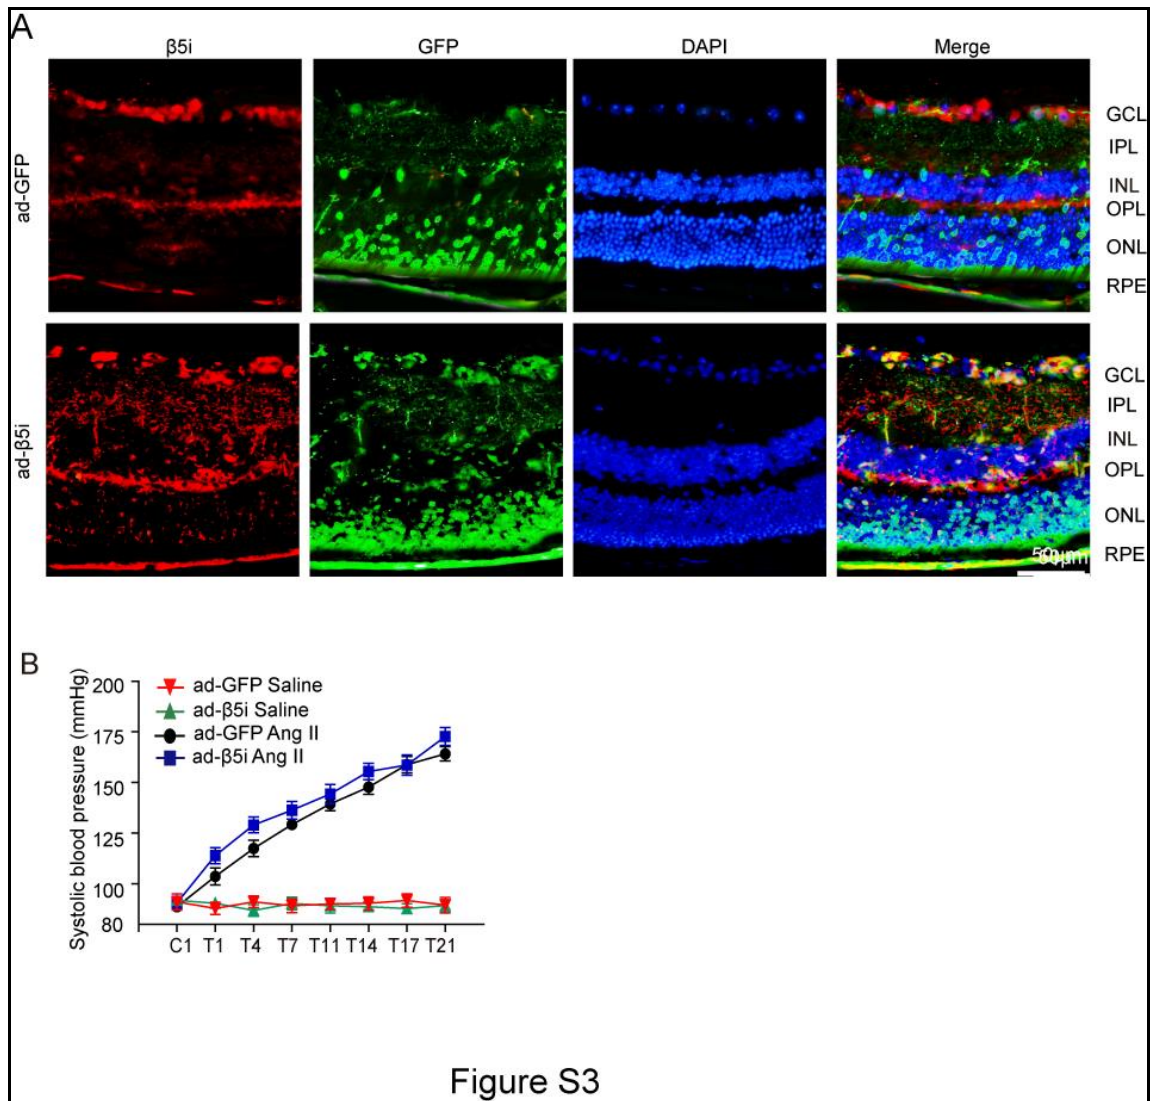

Figure S3

**Figure 3. Effect of  $\beta 5i$  overexpression on systolic blood pressure in mice.** (A) WT mice were locally injected with Ad- $\beta 5i$  or Ad-GFP at a dose of  $1.2 \times 10^{12}$  pfu/ml and then infused with Ang II (3000 ng/kg/minute) for 3 weeks. Evaluation of GFP fluorescence and immunostaining of  $\beta 5i$  expression were performed 3 days after second injection. Nuclei were counterstained with DAPI (blue). Scale bar, 50  $\mu$ m. (B) Average systolic blood pressure (SBP) in Ad-GFP-injected mice and Ad- $\beta 5i$ -injected mice before (C) and after saline or Ang II treatment (T) period. C1: day 1 before saline or Ang II treatment, T1: day 1 after saline or Ang II treatment etc (n=9 per group). Data are the mean  $\pm$  SEM.

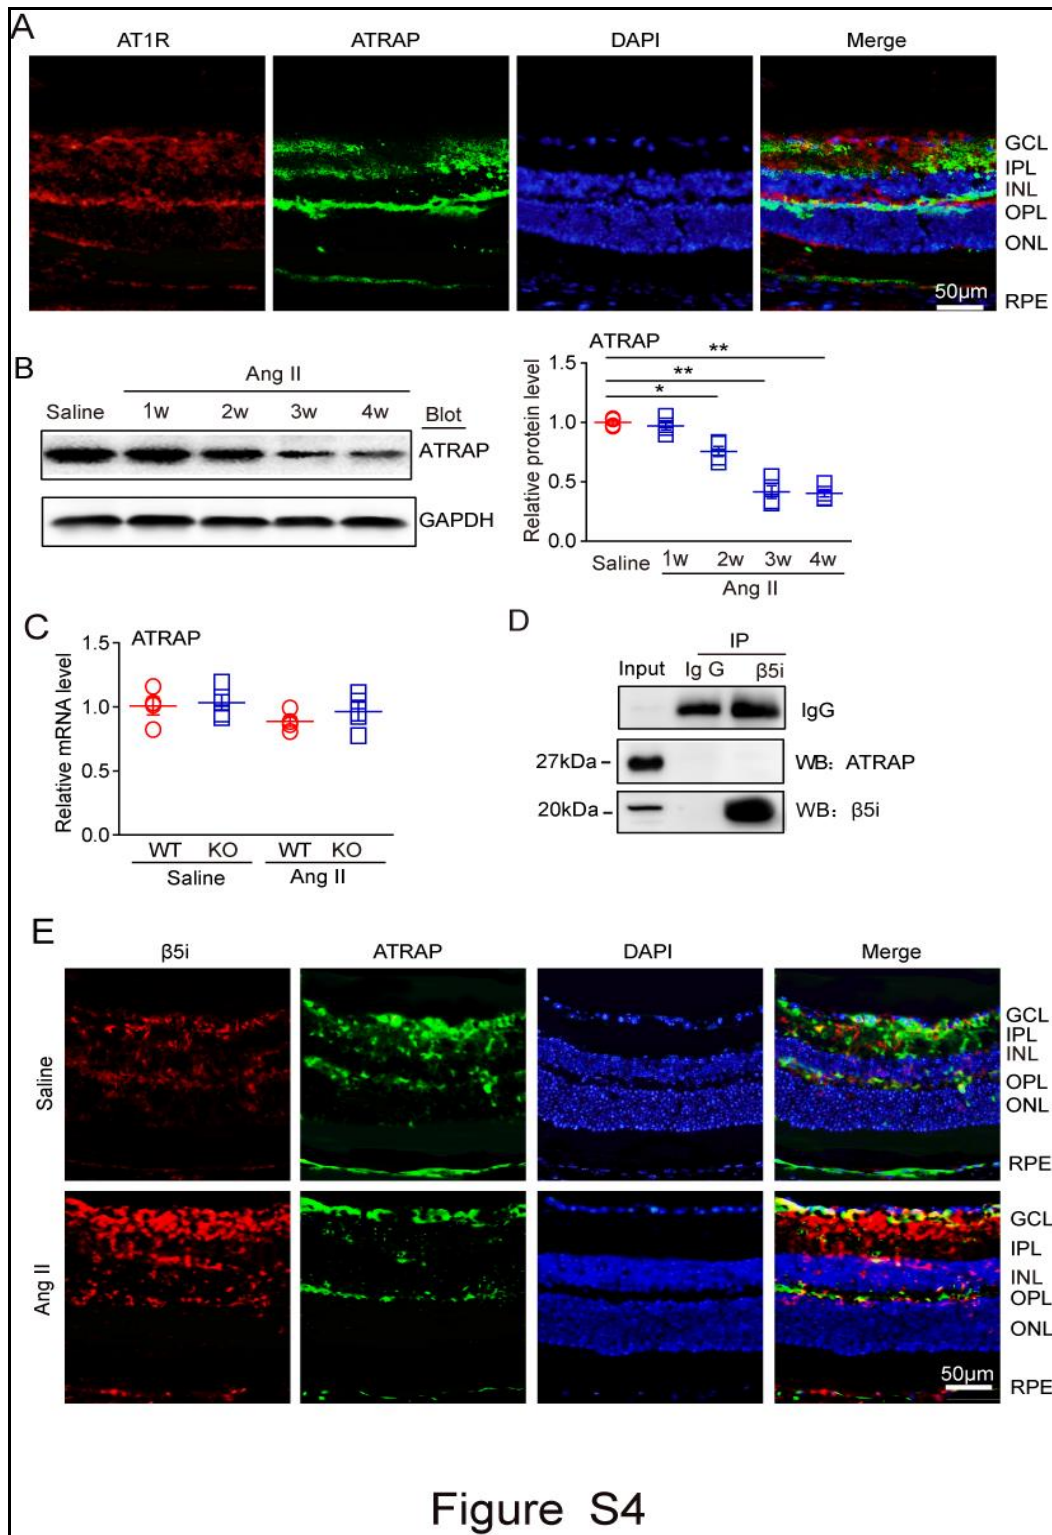

Figure S4

**Figure 4. Expression patterns of AT1R, ATRAP and β5i in the retinal sections.** (A) Immunostaining of the expression of endogenous AT1R and ATRAP proteins in the central retinal sections with antibody against anti-AT1R and anti-ATRAP. Scale bar: 50 μm. (B) PCR analysis of *ATRAP* mRNA levels in the retinas from WT and β5i KO mice after saline or Ang II infusion (n=4 per group). (C) Immunoprecipitation (IP)

was performed in retinal lysates with IgG control or anti- $\beta 5i$  antibody, and analyzed by western blot (WB) with antibody to detect endogenous ATRAP or  $\beta 5i$ . (D) Immunostaining of the expression of endogenous  $\beta 5i$  and ATRAP proteins in the central retinal sections with antibody against anti- $\beta 5i$  and anti-ATRAP. Scale bar: 50  $\mu\text{m}$ . \* $P < 0.05$ , \*\* $P < 0.01$ , vs. saline control mice.

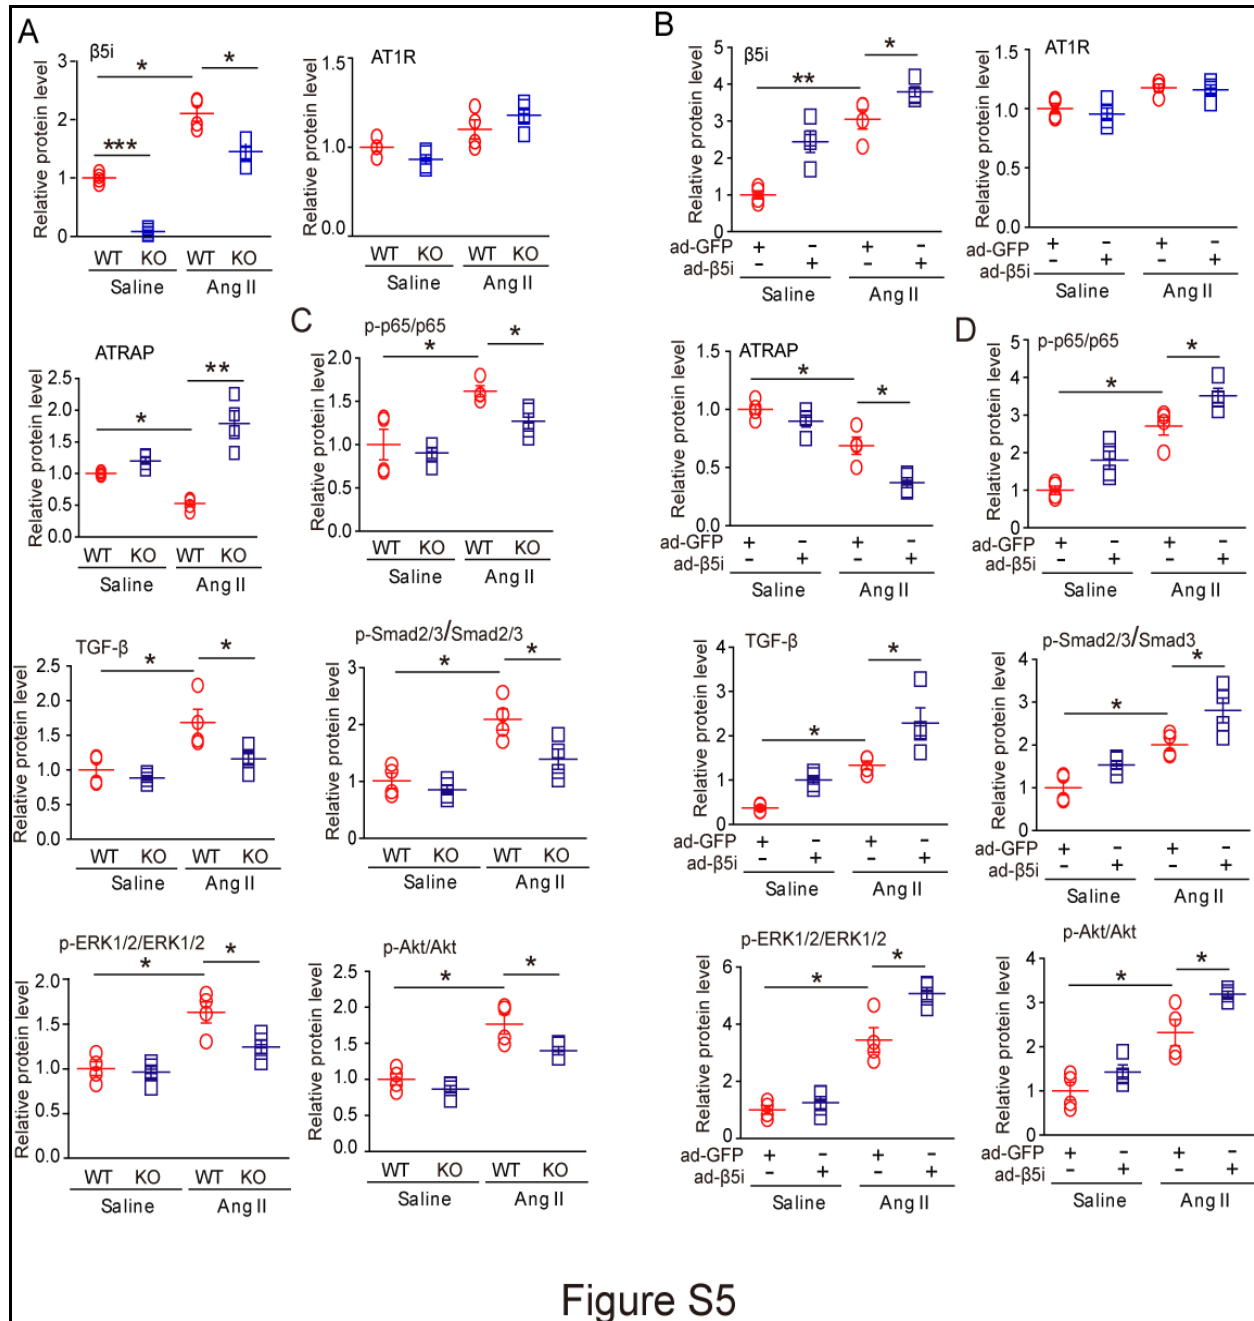

**Figure S5. Quantification of corresponding protein bands. (A)** Quantification of  $\beta 5i$ , AT1R, ATRAP, p-p65, p65, TGF- $\beta$ , Smad2/3, p-Smad2/3, ERK1/2, p-ERK1/2, Akt and p-Akt protein levels in the retinas from WT and  $\beta 5i$  KO mice infused with

saline or Ang II (3000 ng/kg/minute) or saline for 3 weeks (n = 4 per group). **(B)** Quantification of  $\beta 5i$ , AT1R, ATRAP, p-p65, p65, TGF- $\beta$ , Smad3, p-Smad2/3, ERK1/2, p-ERK1/2, Akt, and p-Akt protein levels in the retinas from WT mice locally injected with Ad- $\beta 5i$  or Ad-GFP infused with saline or Ang II (3000 ng/kg/minute) or saline for 3 weeks (n = 4 per group). Data are presented as the mean  $\pm$  SEM. \* $P$  < 0.05, \*\* $P$  < 0.01, \*\*\* $P$  < 0.001 vs. saline control or Ang II-infused WT or ad-GFP-injected WT mice.

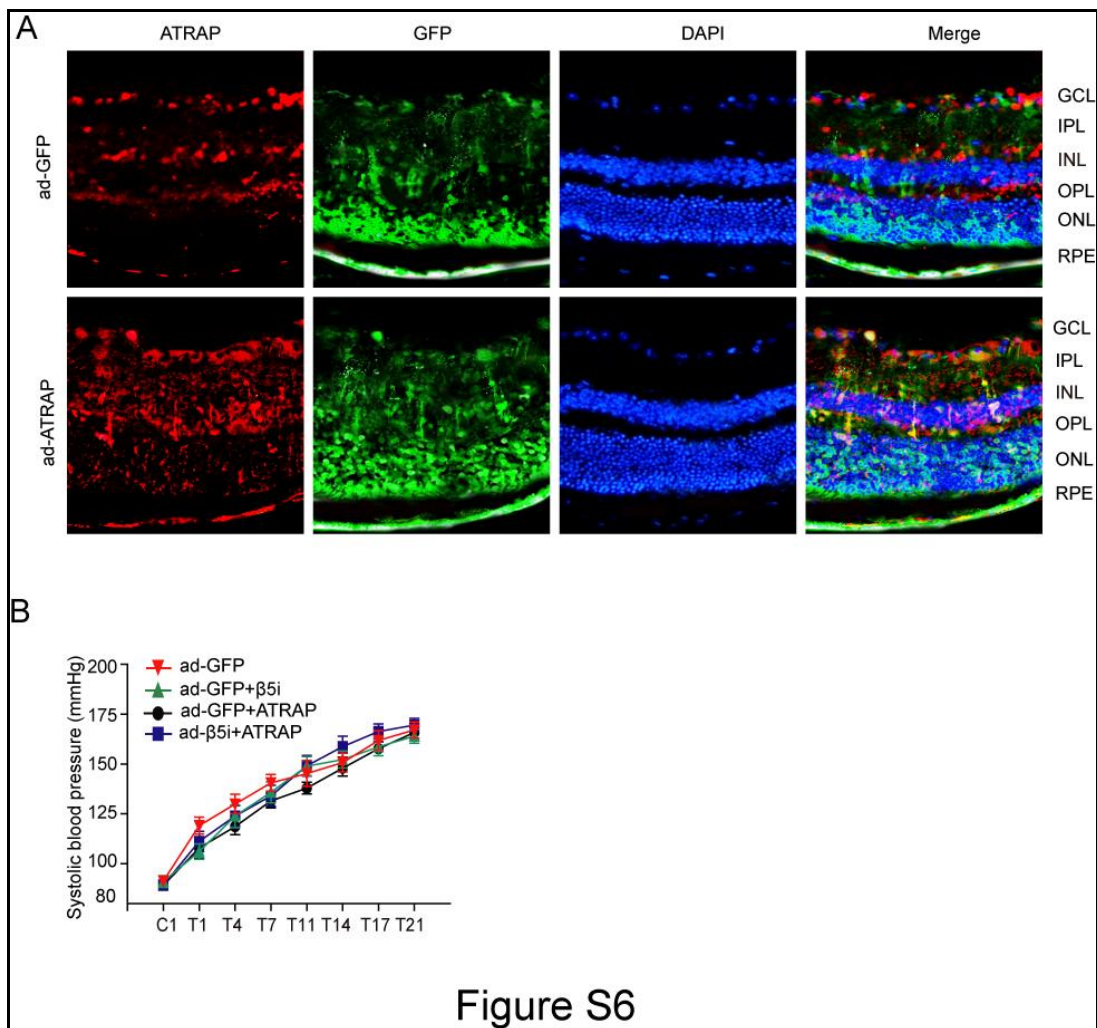

**Figure S6. Effect of  $\beta 5i$  and ATRAP overexpression on systolic blood pressure in mice.** **(A)** WT mice were locally injected with Ad-GFP, Ad- $\beta 5i$ , or Ad-ATRAP at a dose of  $1.2 \times 10^{12}$  pfu/ml and then infused with Ang II (3000 ng/kg/minute) for 3 weeks. Evaluation of GFP fluorescence and immunostaining of ATRAP expression were performed 3 days after second injection. Nuclei were counterstained with DAPI

(blue). Scale bar, 50  $\mu$ m. **(B)** Average systolic blood pressure (SBP) in WT mice injected with Ad-GFP, Ad-GFP+ $\beta$ 5i, Ad-GFP+ATRAP and Ad- $\beta$ 5i+ATRAP before (C) and after saline or Ang II treatment (T) period. C1: day 1 before saline or Ang II treatment, T1: day 1 after saline or Ang II treatment etc (n=10 per group). Data are the mean  $\pm$  SEM.

## Supplemental Methods

**Table S1.** Sequence of the primers used in the quantitative real-time PCR assay

| Gene         | Forward Primer (5'-3')        | Reverse Primer (5'-3') |
|--------------|-------------------------------|------------------------|
| $\beta$ 1i   | CTGGAGCTACACGGGTTGGA          | ATATACCTGTCCCCCTCACATT |
| $\beta$ 2i   | CAGCCGTCTGCCCTTTACTG          | AGAGCCCAGGTCACCTCAGGAT |
| $\beta$ 5i   | CTTGGCACCATGTCTGGTTGT         | CCGGTACTGCAGCATCATGT   |
| $\beta$ 1    | CCAATCGAGTGACTGACAAGCT        | GGACTAGTGGAGGCTCGTTCA  |
| $\beta$ 2    | AGGCCAGATATGGAGGAGGAA         | GGGCACTGAGAATGGACGAA   |
| $\beta$ 5    | TGCTCGCTAACATGGTGTATCAGTA     | AGCCAGAGCCCACTGAGAAG   |
| NOX1         | CAGTTATTCATATCATTGCACACCTATTT | CAGAAGCGAGAGATCCATCCA  |
| NOX4         | GCACGCTGTTGATTTTTATGG         | GCGAGGCAGGAGAGTCAGTA   |
| ph22phox     | CTCCTCTTCACCCTCACTCG          | GTGGACTCCCATTGAGCCTA   |
| IL-1 $\beta$ | CTTCCCCAGGGCATGTTAAG          | ACCCTGAGCGACCTGTCTTG   |
| IL-6         | TTCCATCCAGTTGCCTTCTTG         | TTGGGAGTGGTATCCTCTGTGA |
| ATRAP        | CGTTGGAAGTGGCGCAAC            | ACCAGGAGAATAACCTGAGCG  |
| GAPDH        | GTGTTTCCTCGTCCCGTAGA          | AATCTCCACTTTGCCACTGC   |
